# Supplementary material for: Analysis of overlapping genetic association in type 1 and type 2 diabetes
Source: Springer Nature journal article supplement (doi:10.1007/s00125-021-05428-0), 2021-04-08
Supplement: MOESM1 [file 19046438]

# 1 **Electronic supplementary material**

## 2 **Methods**

### 3 ***Imputation***

4 Imputation for the type 1 diabetes analysis was performed using the Michigan  
5 Imputation server, pre phasing using SHAPEIT2 and imputation using Minimac3

6 <sup>1</sup>. Prior to imputation, variants out of Hardy-Weinberg Equilibrium ( $p$   
7 value  $< 1 \times 10^{-6}$ ), rare variants (minor allele frequency  $< 0.01$ ) and variants with  
8 high missing call rate ( $> 0.95$ ) were excluded. Remaining variants were then  
9 aligned to the HRC reference panel strand using the following pipeline  
10 <https://www.well.ox.ac.uk/~wrayner/tools/>.

### 11 ***Type 1 diabetes GWAS***

12 Association of each variant with type 1 diabetes was assessed using *SNPTEST*,  
13 the 'newml' method <sup>2</sup>, adjusting for the three largest principal components  
14 within that collection from a pruned ( $r^2 < 0.2$ ) genetic matrix without rare  
15 variants (MAF  $> 0.01$ ).

16 The UK collections were combined in an inverse-variance weighted meta-  
17 analysis. However, prior to meta-analysis, variants were excluded from the  
18 results in that collections if:

- 19 1) a variant had an imputation information score of  $< 0.3$  in cases or controls
- 20 2) the difference in imputation information score between cases and controls  
21 was  $> 0.05$

22 Following the UK meta-analysis, variants were excluded based on the following  
23 criteria:

24 1) if there was a difference in MAF in controls between the Affymetrix and the  
25 Illumina collections of  $>0.05$

26 2) if there was a difference in MAF in cases between the Affymetrix and the  
27 Illumina collections of  $>0.05$

28 3) if there was a difference in MAF of  $>0.05$  between controls and the HRC  
29 reference panel MAF

30 4) if the difference in log-odds ratio estimate between the Affymetrix and  
31 Illumina collections was  $>0.5$

32 Once the UK estimates were obtained, the UK-Sardinia meta-analysis was carried  
33 out, including only variants with  $MAF > 0.01$  in Sardinians into the meta-analysis  
34 (those with  $MAF < 0.01$  in Sardinians but included in the UK analysis would be  
35 included in the final results but with only the UK results contributing towards  
36 the overall association statistic). Any variant excluded in the UK-ancestry  
37 analysis was also excluded from the UK-Sardinia meta-analysis.

### 38 ***Regions associated with both diseases***

39 To identify regions to examine in colocalisation analyses, we first calculated the  
40 false discovery rate (FDR) value for each variant after excluding the HLA region  
41 in the type 1 diabetes analysis. Once an associated region was identified from the  
42 set of genome wide associations, a 0.5Mb window around the index variant was  
43 excluded and placed in the list of regions for downstream analyses. Then the  
44 next most associated variant was identified and a 0.5Mb region around this  
45 variant was added to this list of regions for downstream analysis. This process  
46 was repeated until no variants were left with an  $FDR < 0.01$ . This process  
47 identified 98 type 1 diabetes 0.5Mb regions for downstream analysis.

48 The same process was then performed for type 2 diabetes, without exclusion of  
49 the HLA region to calculate the FDR value for each variant. This process  
50 identified 852 type 2 diabetes 0.5Mb regions for downstream analysis.  
51 All overlapping regions were then kept for conditional analyses, and  
52 colocalisation analyses, taking the union of the overlapping regions as the region  
53 to analyse.

#### 54 ***Conditional analyses***

55 Forward stepwise conditional regression for type 1 diabetes was carried out  
56 using UK data only, performed using the Affymetrix and then the Illumina data,  
57 before meta-analysing. The procedure was stopped when a variant added to the  
58 model had a Wald test meta-analysis p value of  $>6.25 \times 10^{-6}$ , which was the  
59 maximum p value from univariable analyses with a false discovery rate  
60 (FDR) $<0.01$ . Once all conditionally independent associations were identified,  
61 then all conditionally independent signals were included in the model to re-  
62 examine the association in the primary association signal.

63 Forward stepwise conditional regression for type 2 diabetes was carried out  
64 using the 'cojo' option in GCTA <sup>3</sup>.

#### 65 ***eCAVIAR***

66 *eCAVIAR* analyses <sup>4</sup> were performed using the T1D Illumina cohort to generate  
67 an LD matrix for variants included in the analysis, and this structure was  
68 assumed to be consistent for the T1D and T2D datasets. The same variants were  
69 included in the analyses as in the *coloc* analysis. We performed analyses in the  
70 same way as in the *coloc* analysis, by conditioning on other association signals in  
71 the region and examining colocalisation using conditional summary statistics

72 where relevant. We therefore assumed the maximum number of causal variants  
73 for each colocalisation analysis was 1.

74 eCAVIAR enumerates the colocalisation posterior probability (CLPP) for each  
75 variant included in the analysis. In order to obtain an estimate for colocalising  
76 signals across the region, which is more similar to the hypothesis *coloc* is testing,  
77 we summed each variant CLPP to obtain the eCAVIAR regional CLPP, which are  
78 reported in **ESM Table 3**.

79 ***Code availability***

80 Code used to carry out this analysis is available at  
81 <https://github.com/jinshaw16/t1d-t2d-colocalisation>.

82

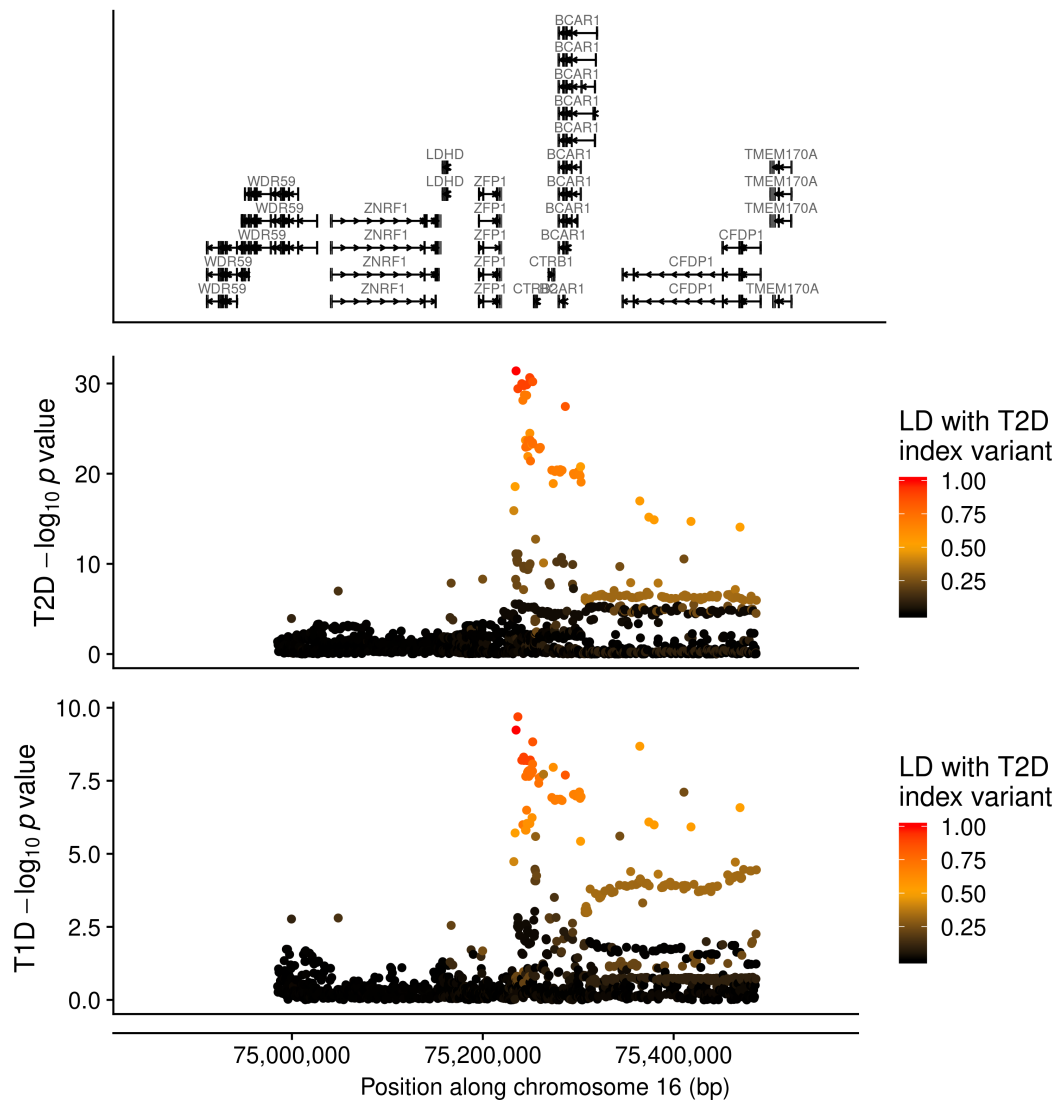

83

84 **ESM Figure 1:** Manhattan plots showing  $-\log_{10}p$  value of association for each  
 85 variant by position along chromosome 16 (genome build 37) in the  
 86 *CTRB1/BCAR1* region for type 2 diabetes (middle panel) and type 1 diabetes  
 87 (bottom panel), coloured by  $r^2$  to the type 2 diabetes index variant, rs72802342.

88

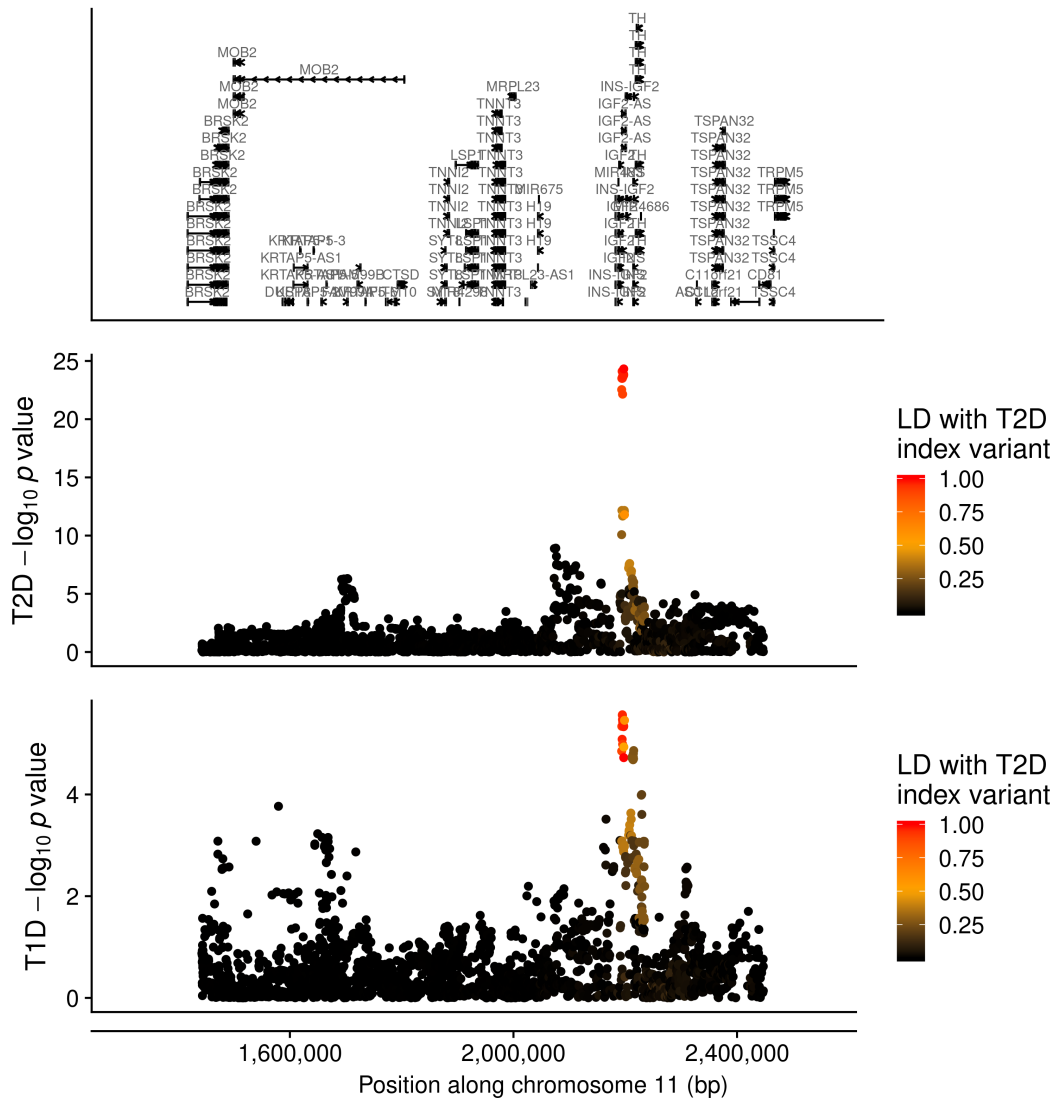

89

90 **ESM Figure 2:** Manhattan plots showing  $-\log_{10}p$  value of association for each  
 91 variant by position along chromosome 11 (genome build 37) in the *INS* region  
 92 for type 2 diabetes (middle panel) and type 1 diabetes (bottom panel),  
 93 conditional on primary signal index variant rs689, coloured by  $r^2$  to the type 2  
 94 diabetes index variant, rs4929965.

95

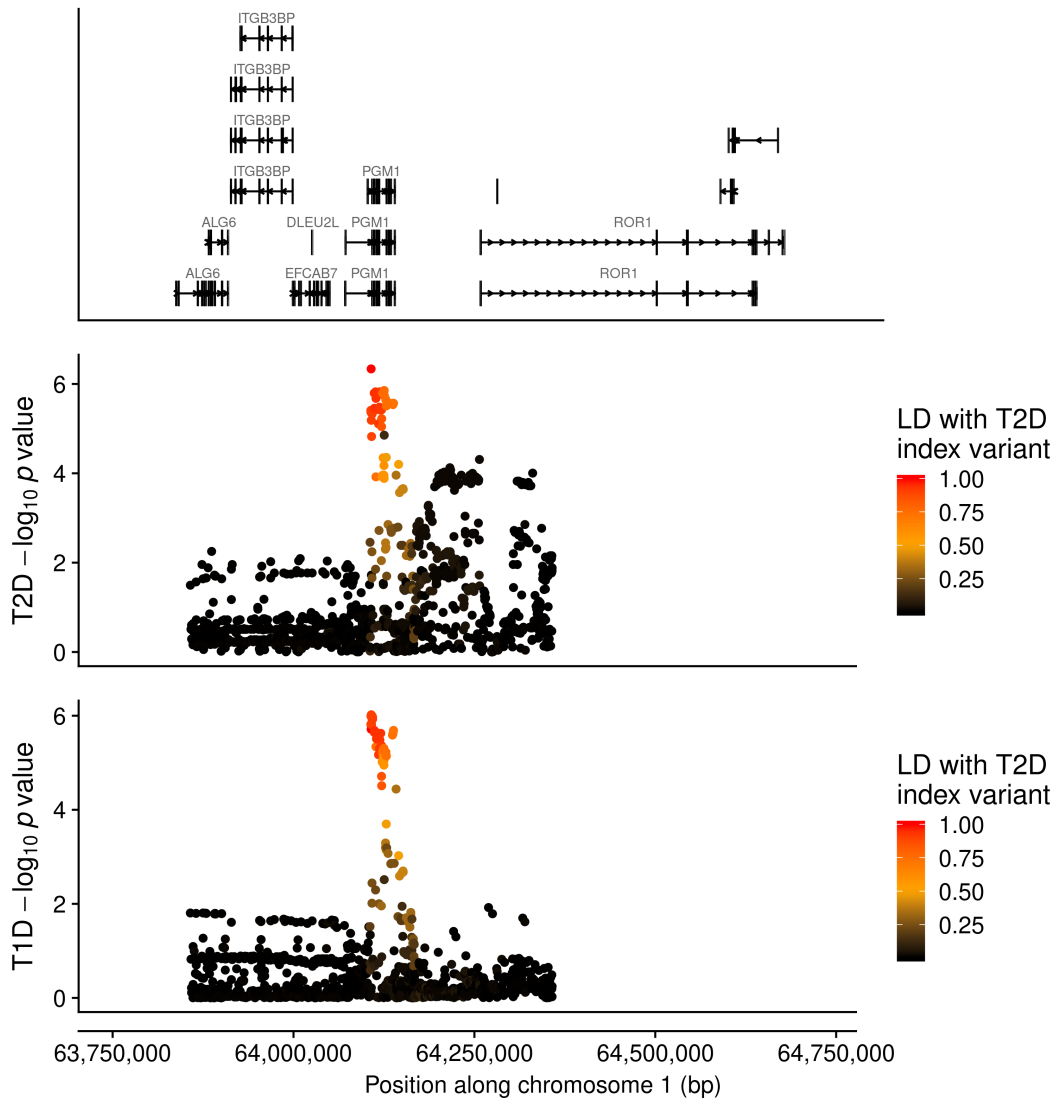

96

97 **ESM Figure 3:** Manhattan plots showing  $-\log_{10} p$  value of association for each  
 98 variant by position along chromosome 1 (genome build 37) in the *PGM1* region  
 99 for type 2 diabetes (middle panel) and type 1 diabetes (bottom panel), coloured  
 100 by  $r^2$  to the type 2 diabetes index variant, rs2269247.

101

102 **References**

103

- 104 1. Das, S. *et al.* Next-generation genotype imputation service and methods.  
105 *Nat. Genet.* **48**, 1284–1287 (2016).
- 106 2. Marchini, J. & Howie, B. Genotype imputation for genome-wide association  
107 studies. *Nat. Rev. Genet.* **11**, 499–511 (2010).
- 108 3. Yang, J. *et al.* Conditional and joint multiple-SNP analysis of GWAS  
109 summary statistics identifies additional variants influencing complex  
110 traits. *Nat. Genet.* **44**, 369–375 (2012).
- 111 4. Hormozdiari, F. *et al.* Colocalization of GWAS and eQTL Signals Detects  
112 Target Genes. *Am. J. Hum. Genet.* **99**, 1245–1260 (2016).

113
